# Supplementary material
Source: PubMed Central journal article supplement (PMC2878499)

## Supplemental Material

**Table S1.** Strains used in this study

| Strain                   | Genotype                                                                  |
|--------------------------|---------------------------------------------------------------------------|
| WT - YPH499              | <i>MATa ura3-52 lys2-801 ade2-101 trp1-Δ63 his3-Δ200 leu2-Δ1</i>          |
| $\Delta YHM2$            | as YPH499 but $\Delta YHM2::HIS3$                                         |
| $\Delta CTP1$            | “ “ “ $\Delta CTP1::KanMX3$                                               |
| $\Delta ZWF1$            | “ “ “ $\Delta ZWF1::KanMX3$                                               |
| $\Delta YHM2\Delta CTP1$ | “ “ “ $\Delta YHM2::HIS3 \Delta CTP1::KanMX3$                             |
| $\Delta YHM2\Delta ZWF1$ | “ “ “ $\Delta YHM2::HIS3 \Delta ZWF1::NatMX4$                             |
| $\Delta CTP1\Delta ZWF1$ | “ “ “ $\Delta CTP1::KanMX3 \Delta ZWF1::NatMX4$                           |
| UTL-7A                   | <i>MATa ura3-52 trp1 leu2-3,112</i>                                       |
| BJ1991 $\Delta$ pox1     | <i>MATa leu2 ura3-52 trp1 pep4-3 prb1-1122 gal2Δ</i><br><i>POX1::LEU2</i> |

**Table S2.** Percentage of non-viable cells. Yeast strains, precultured in YP with glucose and grown in acetate-supplemented SC, were incubated in the presence or absence of H<sub>2</sub>O<sub>2</sub> for 60 min. After this time-period the cells were washed and tested for viability.

| Strain                   | Untreated (%) | Treated with H <sub>2</sub> O <sub>2</sub> (%) | Boiled |
|--------------------------|---------------|------------------------------------------------|--------|
| Wild-type                | 1.8 ± 0.6     | 5.5 ± 2.0                                      | 99.7   |
| $\Delta YHM2$            | 1.8 ± 0.5     | 5.6 ± 1.2                                      | 99.8   |
| $\Delta ZWF1$            | 1.2 ± 0.2     | 5.0 ± 1.8                                      | 99.6   |
| $\Delta YHM2\Delta ZWF1$ | 1.5 ± 0.2     | 8.2 ± 2.1                                      | 99.8   |

**Fig. S1.** Expression in *S. cerevisiae* and purification of Yhm2p. Proteins were separated by SDS-PAGE and stained with Coomassie-blue dye (A) or transferred to nitrocellulose and immunodecorated with an anti-Yhm2p polyclonal antiserum (B). Lanes 1-3 (A and B), mitochondrial protein (30 μg) from wild-type (lane 1),  $\Delta YHM2$  (lane 2) and *YHM2-pYES2* (lane 3) strains. Cells were harvested 6 h after addition of galactose. Lanes 4, 1.5 μg (A) and 0.3 μg (B) Yhm2p purified from *YHM2-pYES2* mitochondria.

**Fig. S2.** Yhm2p is localized to mitochondria. (A) Immunological detection of Yhm2p in a sucrose density gradient. Cell-free extracts of oleic acid-induced wild-type cells (UTL-7A) were separated on a continuous sucrose density gradient (32-54%). The resulting fractions were analyzed for the distribution of Yhm2p, peroxisomal matrix protein Fox3p and mitochondrial Mir1p by immunoblotting. The enzymatic activities of peroxisomal catalase (■) and mitochondrial fumarase (▲) were determined in the same fractions. Values are presented as the percentage of the peak fraction. Fraction densities are indicated by a hatched line. (B) Detection of Yhm2p in an Accudenz gradient. Peroxisomes were enriched on a sucrose density gradient (32-54%) and re-isolated by a 25,000x g centrifugation step. The organelles were then separated on an Accudenz gradient (20-40%), and the distribution of Yhm2p was compared to that of peroxisomal Fox3p and Pex11p as well as to mitochondrial Mir1p by immunoblotting.

**Fig. S3.** NADH/NAD<sup>+</sup> ratios in the cytosol of parental and deleted *S. cerevisiae* strains. Yeast strains, precultured in YP with glucose and grown in acetate-supplemented SC, were incubated in the presence (B) or absence (A) of H<sub>2</sub>O<sub>2</sub> for 60 min. NADH/NAD<sup>+</sup> ratios and the sums of NADH + NAD<sup>+</sup> are reported as means ± S.E.M. of at least three independent experiments. Differences between the NADH/NAD<sup>+</sup> ratio of  $\Delta ZWF1$  and  $\Delta YHM2\Delta ZWF1$  cells and control (wild-type cells) in the presence of H<sub>2</sub>O<sub>2</sub> were significant (\*P

< 0.05, one-way ANOVA followed by Bonferroni's *t*-test).

Fig. S4. NADH and NAD<sup>+</sup> levels in the mitochondria of parental and deleted *S. cerevisiae* strains. Yeast strains, precultured in YP with glucose and grown in acetate-supplemented SC, were incubated in the presence (B) or absence (A) of H<sub>2</sub>O<sub>2</sub> for 60 min. The sums of NADH + NAD<sup>+</sup> with and without H<sub>2</sub>O<sub>2</sub>, and the NADH/NAD<sup>+</sup> ratio with H<sub>2</sub>O<sub>2</sub> are reported as means ± S.E.M. of at least three independent experiments.

**Fig. S1**

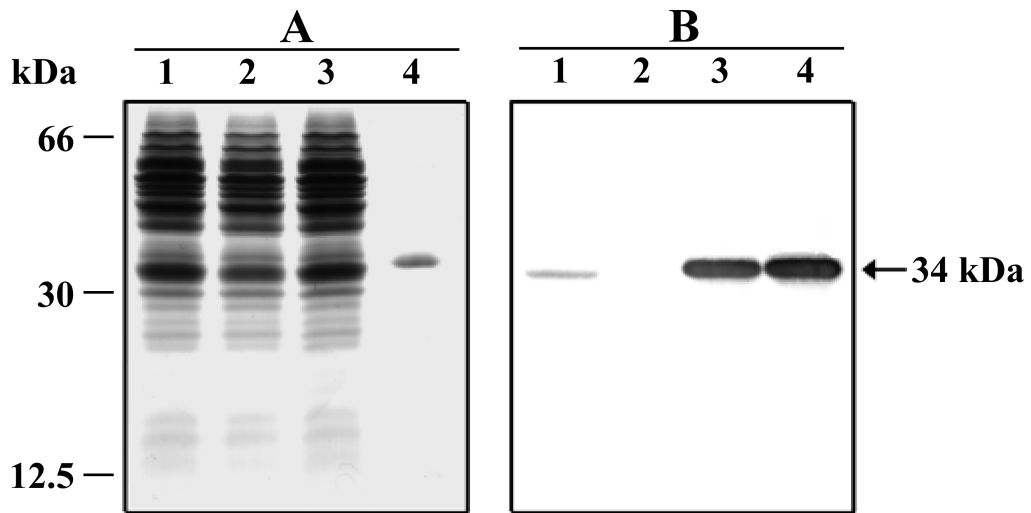

**Fig. S2**

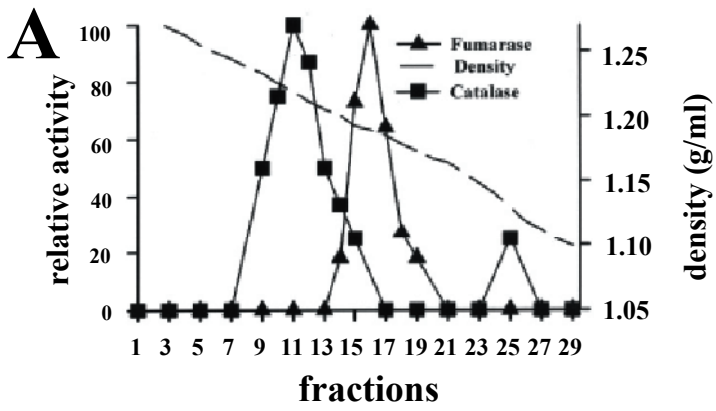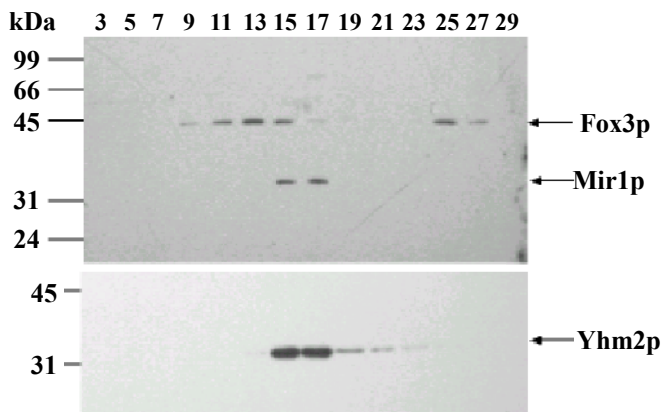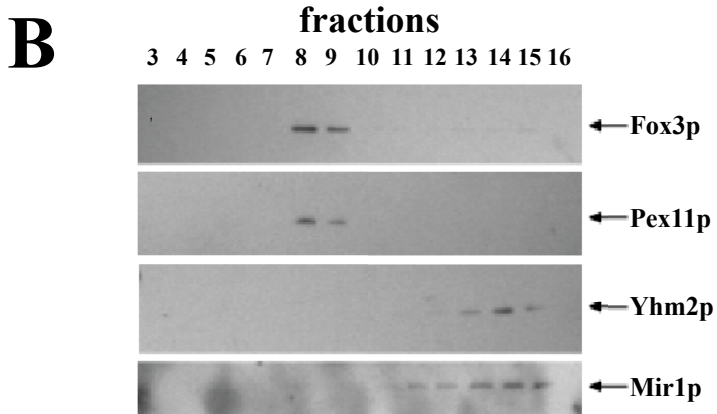

**Fig. S3**

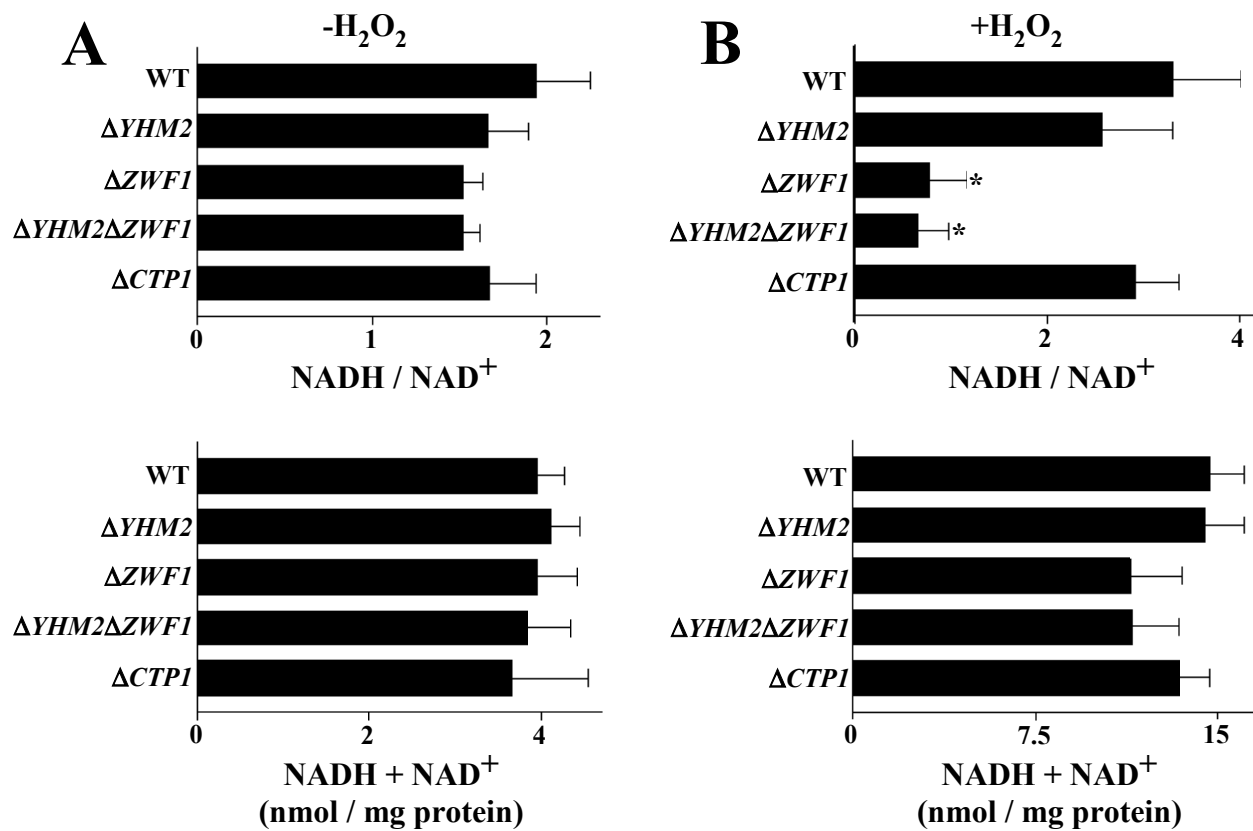

**Fig. S4**

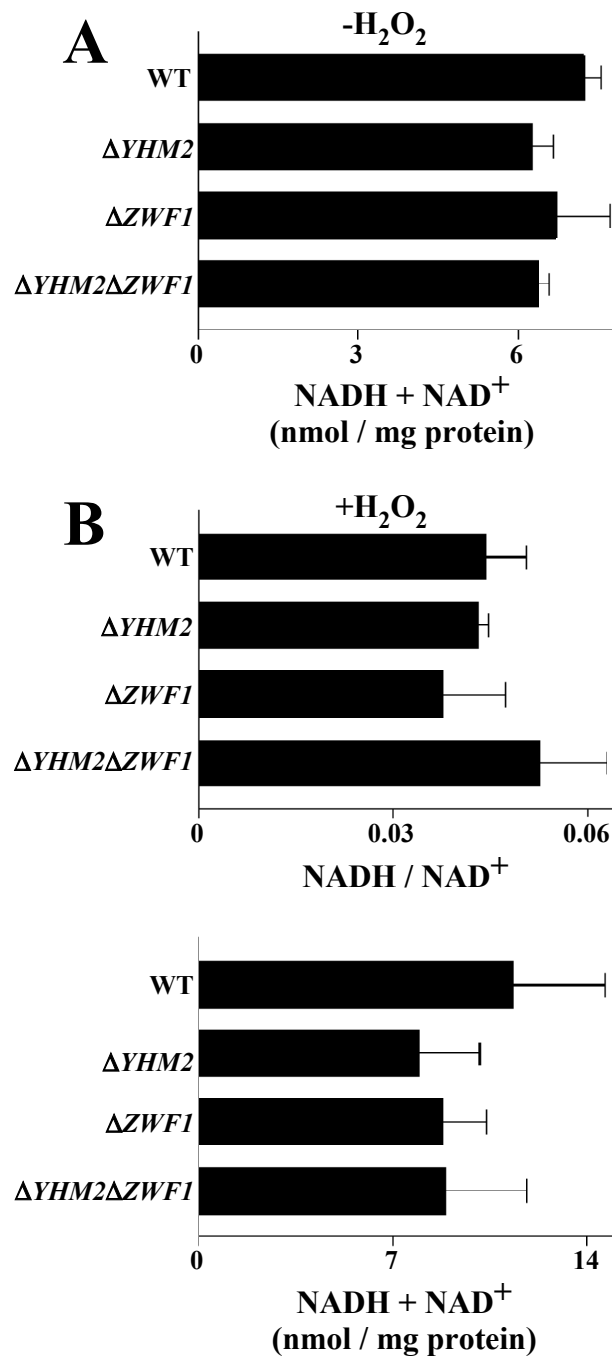

Supplement: supp_M109.097188_Supplemental_material_for_Ms_JBC-2009-097188.pdf [file supp_M109.097188_Supplemental_material_for_Ms_JBC-2009-097188.pdf]
